# Supplementary material for: A quantum chemical study on ˙Cl-initiated atmospheric degradation of acrylonitrile
Source: Royal Society of Chemistry journal article supplement (doi:10.1039/c7ra01521f), 2017-01-01
Supplement: c7ra01521f1.pdf [file c7ra01521f1.pdf]

## Supporting Information

### A Quantum Chemical Study on •Cl-initiated Atmospheric Degradation of Acrylonitrile

Jingyu Sun<sup>1\*</sup>, Youxiang Shao<sup>2</sup>, Wenzhong Wu<sup>3</sup>, Yizhen Tang<sup>4</sup>, Yunju Zhang<sup>5</sup>,

Yiming Hu<sup>1</sup>, Jiangyan Liu<sup>1</sup>, Huiyang Yi<sup>1</sup>, Fang Chen<sup>1</sup>, Yinfang Cheng<sup>1</sup>

<sup>1</sup> *Hubei Collaborative Innovation Center for Rare Metal Chemistry, Hubei Key Laboratory of  
Pollutant Analysis & Reuse Technology, College of Chemistry and Chemical Engineering, Hubei  
Normal University, Cihu Road 11, Huangshi, Hubei 435002, P. R. China*

<sup>2</sup> *School of Materials Science and Engineering, MOE Key Laboratory of Bioinorganic and  
Synthetic Chemistry, Sun Yat-sen University, Guangzhou 510275, P. R. China*

<sup>3</sup> *College of Foreign Languages, Hubei Normal University, Cihu Road 11, Huangshi, Hubei  
435002, P. R. China*

<sup>4</sup> *School of Environmental and municipal Engineering, Qingdao Technological University, Fushun  
Road 11. Qingdao, Shandong, 266033 P.R. China.*

<sup>5</sup> *Key Laboratory of Photoinduced Functional Materials, Mianyang Normal University, Mianyang  
621000, PR China*

---

\* Corresponding author. Email address: sunjy231@gmail.com Tel.;; Fax: 0714-6515602

Fig. S1 Optimized geometries (length in Å and angle in degree) for other intermediates, transition states, and products as shown in (a) and (b). The experimental data are in *Italic*.

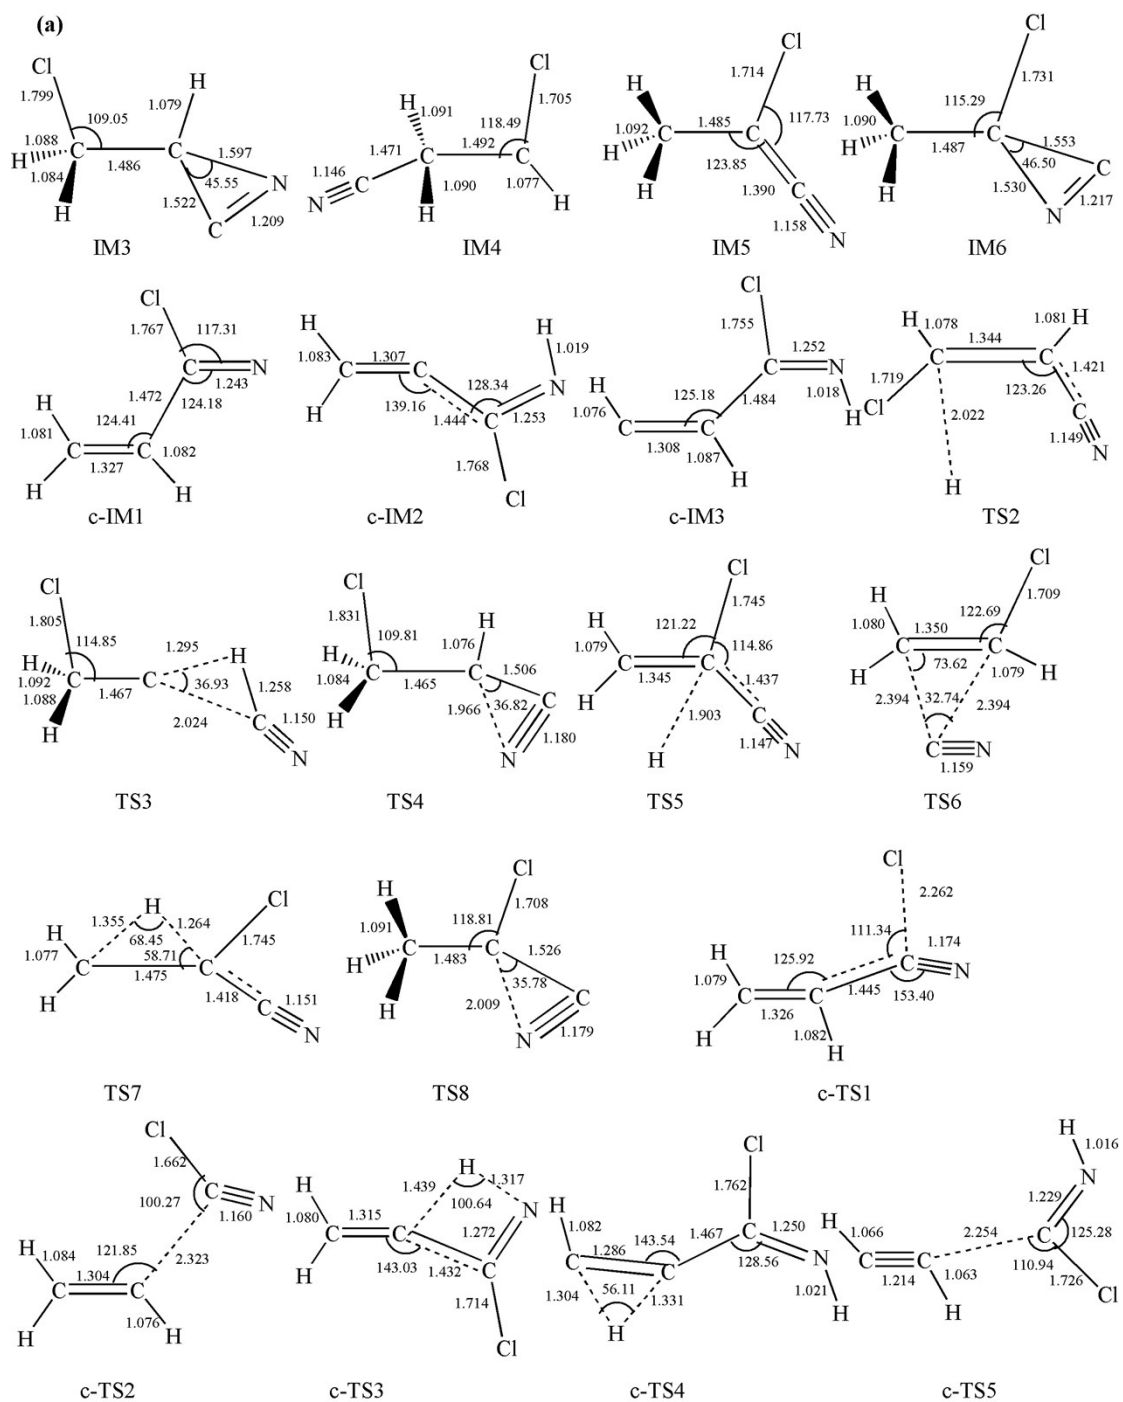

(b)

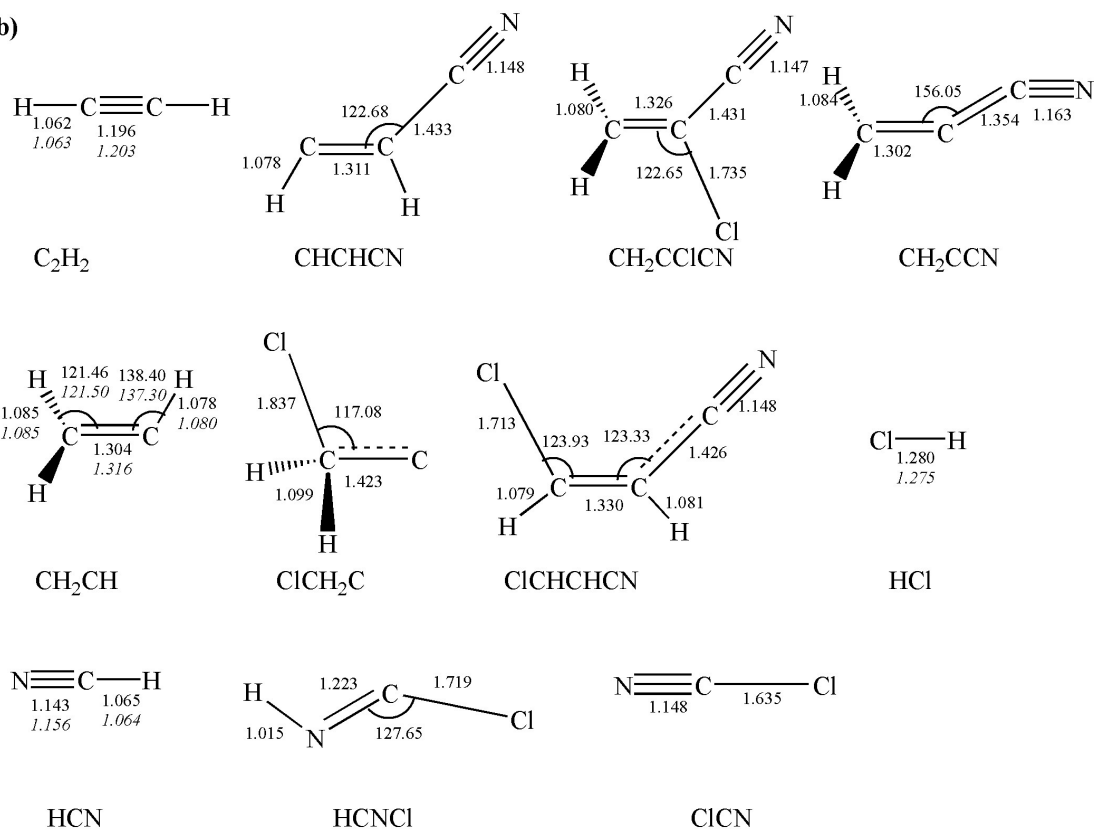

Fig.S2 Potential energy diagram of the unimportant reaction channels (a) and (b) at the UCCSD(T)/cc-pVTZ//M05-2X/6-311++G(d,p) level.

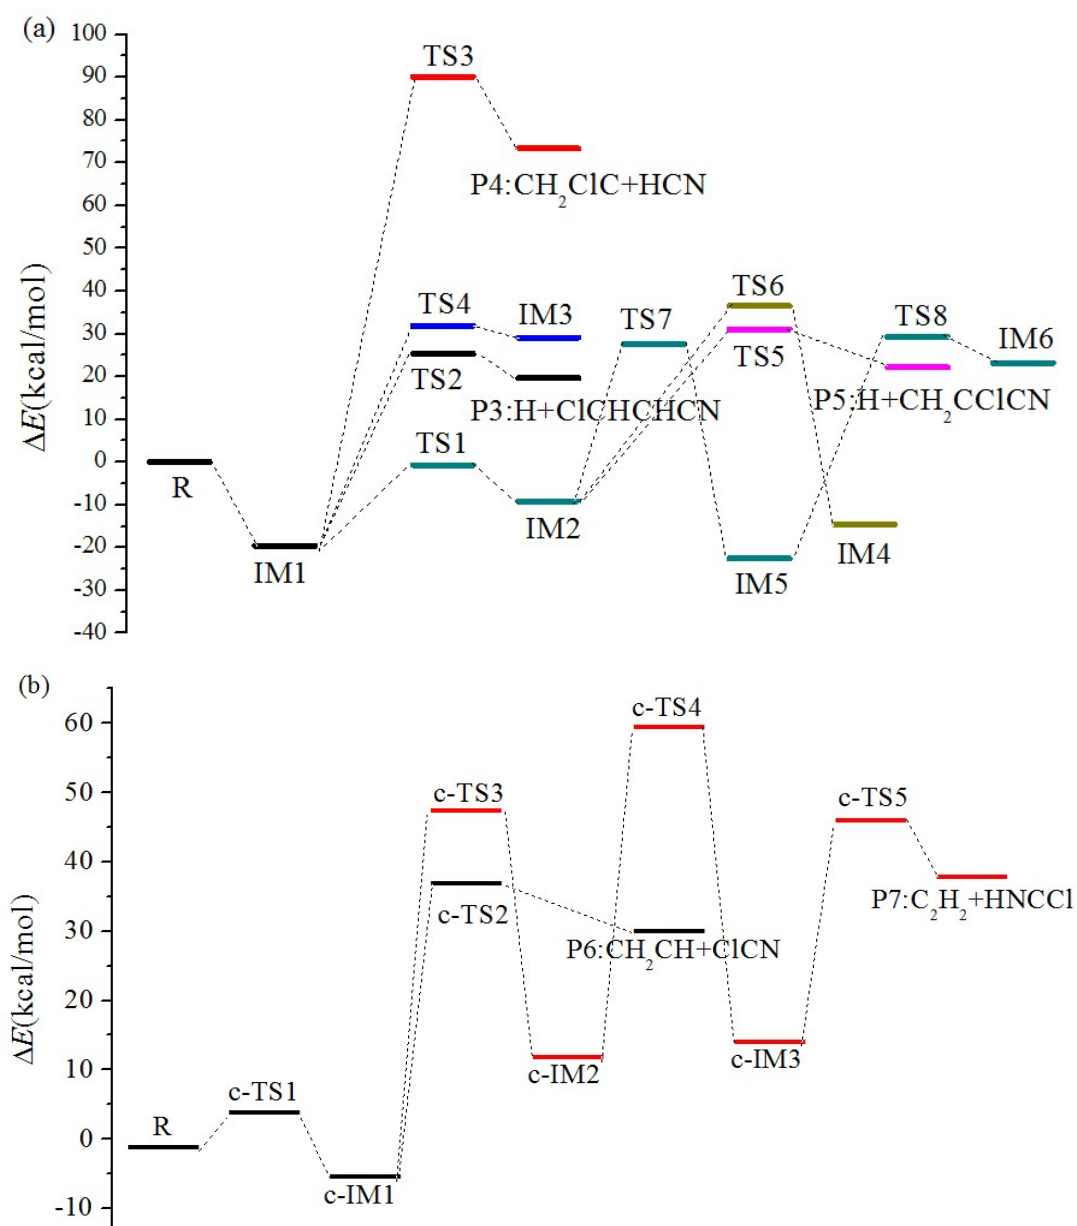

Fig. S3 Temperature dependence of the rate constants at other theoretical methods (a)

at 760 Torr N<sub>2</sub>; (b) at 1 Torr He.

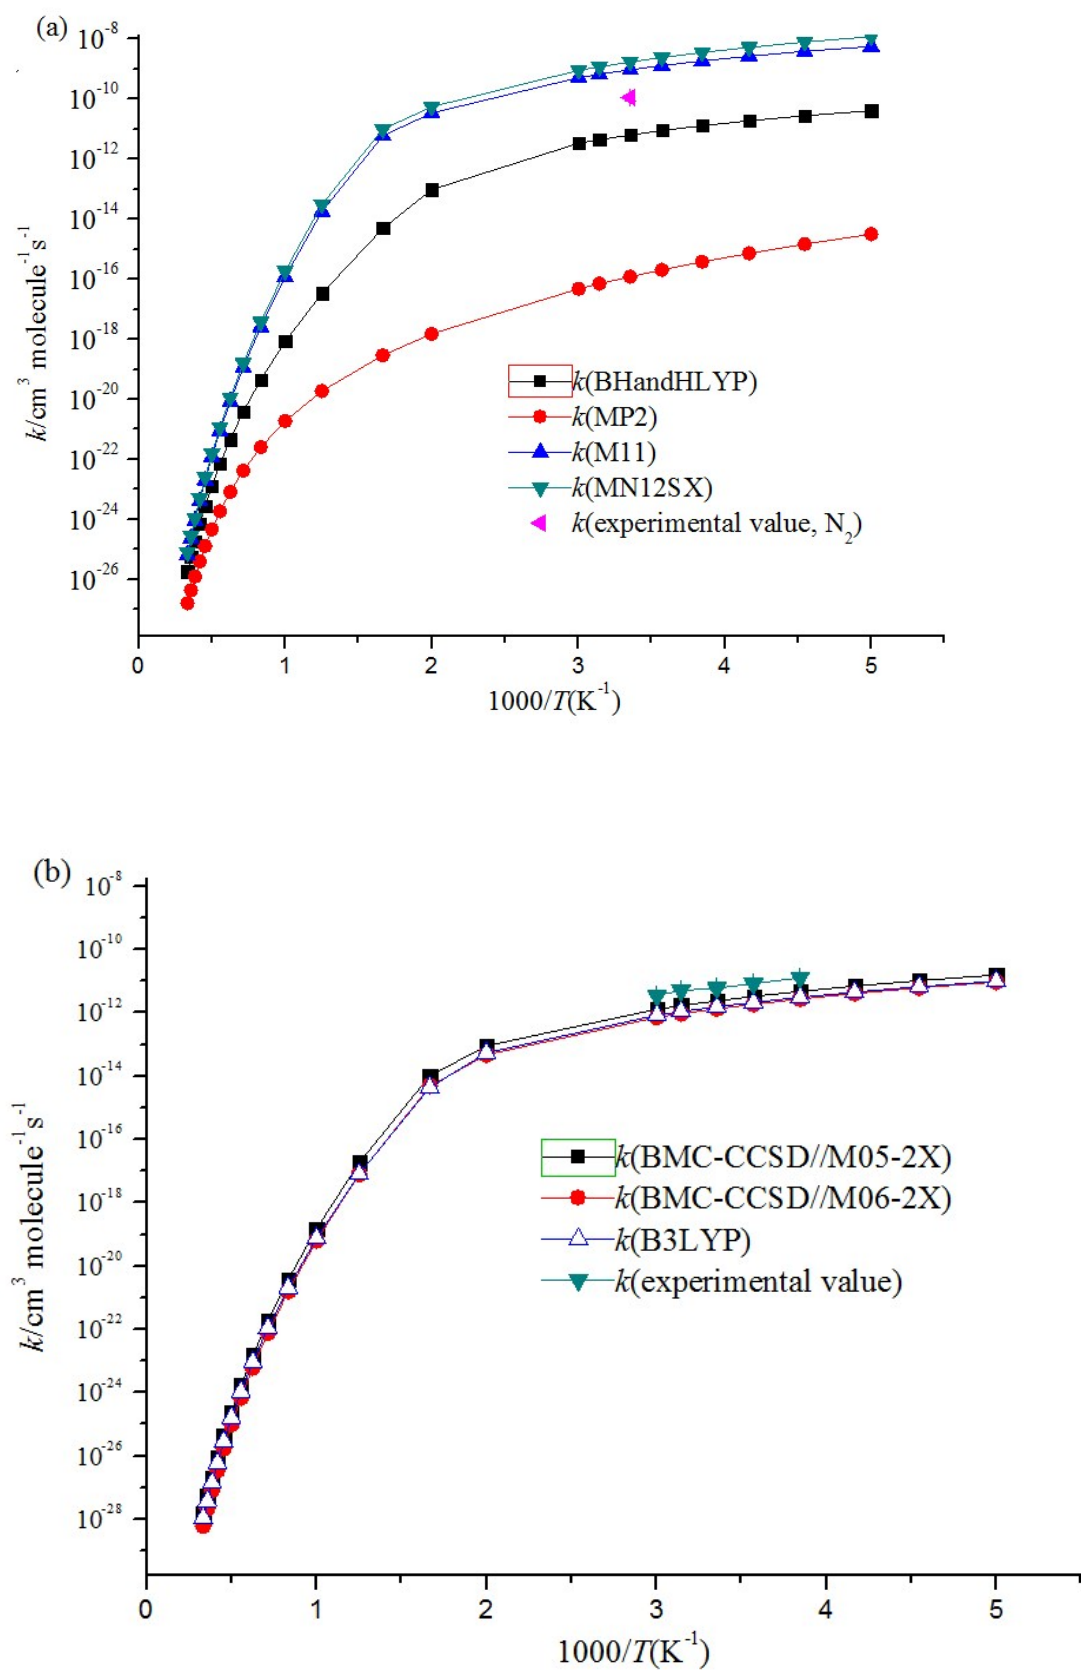

Table S1. Relative energies( $\Delta E$ ) for the other species (energies in kcal mol<sup>-1</sup>).

| Species                                 | $\Delta E^a$ | $\Delta E^b$ |
|-----------------------------------------|--------------|--------------|
| R: CH <sub>2</sub> =CHCN+Cl             | 0.00         | 0.00         |
| P3:H+ClCHCHCN                           | 18.02        | 19.63        |
| P4:CH <sub>2</sub> ClC+HCN              | 71.85        | 73.30        |
| P5:H+CH <sub>2</sub> CClCN              | 20.95        | 22.12        |
| P6:CH <sub>2</sub> CH+ClCN              | 33.19        | 31.19        |
| P7:C <sub>2</sub> H <sub>2</sub> +HNCCl | 38.14        | 39.09        |
| IM3                                     | 23.65        | 29.10        |
| IM4                                     | -18.20       | -14.62       |
| IM5                                     | -26.69       | -22.49       |
| IM6                                     | 17.49        | 23.19        |
| TS2                                     | 25.08        | 25.31        |
| TS3                                     | 90.16        | 90.06        |
| TS4                                     | 28.16        | 31.91        |
| TS5                                     | 31.09        | 31.07        |
| TS6                                     | 33.34        | 36.50        |
| TS7                                     | 23.72        | 27.56        |
| TS8                                     | 26.34        | 29.27        |
| c-IM1                                   | -8.70        | -4.28        |
| c-IM2                                   | 8.28         | 12.97        |
| c-IM3                                   | 10.57        | 15.15        |
| c-TS1                                   | 1.40         | 5.03         |
| c-TS2                                   | 36.67        | 38.05        |
| c-TS3                                   | 44.14        | 48.55        |
| c-TS4                                   | 56.92        | 60.70        |
| c-TS5                                   | 43.82        | 47.22        |

<sup>a</sup>M05-2X/6-311++G(d,p);<sup>b</sup>UCCSD-ccPVTZ//M05-2X/6-311++G(d,p)



Table S2 The coordinates, rotational constants, and harmonic frequencies of reactants and IM1

| Species               | Coordinates(Atom, X, Y, Z) |           |           |           | Rotational constants(cm <sup>-1</sup> ) | Frequencies                                                                                       |
|-----------------------|----------------------------|-----------|-----------|-----------|-----------------------------------------|---------------------------------------------------------------------------------------------------|
| CH <sub>2</sub> =CHCN | C                          | -0.005245 | 0.000000  | -0.005592 | 1.669, 0.168, 0.152                     | 237, 353, 586, 720, 892, 1014, 1027, 1124, 1333, 1463, 1717, 2413, 3197, 3230, 3294               |
|                       | H                          | 0.005412  | 0.000000  | 1.074545  |                                         |                                                                                                   |
|                       | H                          | 0.942153  | 0.000000  | -0.525485 |                                         |                                                                                                   |
|                       | C                          | -1.157515 | 0.000000  | -0.667452 |                                         |                                                                                                   |
|                       | H                          | -2.111380 | 0.000000  | -0.158610 |                                         |                                                                                                   |
|                       | C                          | -1.208053 | 0.000000  | -2.099112 |                                         |                                                                                                   |
|                       | N                          | -1.264285 | 0.000000  | -3.245738 |                                         |                                                                                                   |
| Cl                    | Cl                         | -2.192771 | -0.373494 | 0.000000  |                                         |                                                                                                   |
| IM1                   | C                          | 0.492511  | 0.720855  | 0.471412  | 0.392, 0.065, 0.059                     | 53, 215, 290, 428, 561, 636, 720, 870, 1042, 1153, 1217, 1303, 1416, 1505, 2240, 3134, 3213, 3250 |
|                       | H                          | 0.226236  | 0.441788  | 1.483835  |                                         |                                                                                                   |
|                       | H                          | 0.957050  | 1.701085  | 0.450880  |                                         |                                                                                                   |
|                       | C                          | -0.657625 | 0.642953  | -0.452590 |                                         |                                                                                                   |
|                       | H                          | -0.581900 | 1.062469  | -1.443967 |                                         |                                                                                                   |
|                       | C                          | -1.812983 | -0.052112 | -0.112001 |                                         |                                                                                                   |
|                       | N                          | -2.778996 | -0.615915 | 0.187887  |                                         |                                                                                                   |
|                       | Cl                         | 1.781101  | -0.443004 | -0.068243 |                                         |                                                                                                   |



Table S3 The rate constants at various methods in the temperature of 200-3000 K and at 760 Torr N<sub>2</sub>. ( $k$  is in cm<sup>3</sup> molecule<sup>-1</sup>s<sup>-1</sup>)

| $T(K)$ | $k^a$                     | $k^b$                     | $k^c$                     | $k^d$                     | $k^e$                     | $k^f$                     | $k^g$                     | $k^h$                     | $k^i$                     | $k^j$                     | $k^m$                     | $k^n$                             |
|--------|---------------------------|---------------------------|---------------------------|---------------------------|---------------------------|---------------------------|---------------------------|---------------------------|---------------------------|---------------------------|---------------------------|-----------------------------------|
| 200    | 3.15<br>$\times 10^{-10}$ | 4.09<br>$\times 10^{-11}$ | 3.14<br>$\times 10^{-15}$ | 5.61<br>$\times 10^{-9}$  | 1.19<br>$\times 10^{-8}$  | 1.92<br>$\times 10^{-9}$  | 1.78<br>$\times 10^{-9}$  | 1.98<br>$\times 10^{-9}$  | 1.66<br>$\times 10^{-9}$  | 1.31<br>$\times 10^{-9}$  | 8.74<br>$\times 10^{-10}$ |                                   |
| 220    | 2.55<br>$\times 10^{-10}$ | 2.76<br>$\times 10^{-11}$ | 1.47<br>$\times 10^{-15}$ | 3.85<br>$\times 10^{-9}$  | 7.82<br>$\times 10^{-9}$  | 1.43<br>$\times 10^{-9}$  | 1.29<br>$\times 10^{-9}$  | 1.49<br>$\times 10^{-9}$  | 1.27<br>$\times 10^{-9}$  | 9.62<br>$\times 10^{-10}$ | 6.09<br>$\times 10^{-10}$ |                                   |
| 240    | 2.0<br>$\times 10^{-10}$  | 1.88<br>$\times 10^{-11}$ | 7.25<br>$\times 10^{-16}$ | 2.65<br>$\times 10^{-9}$  | 5.21<br>$\times 10^{-9}$  | 1.06<br>$\times 10^{-9}$  | 9.31<br>$\times 10^{-10}$ | 1.12<br>$\times 10^{-9}$  | 9.65<br>$\times 10^{-10}$ | 7.04<br>$\times 10^{-10}$ | 4.26<br>$\times 10^{-10}$ |                                   |
| 260    | 1.60<br>$\times 10^{-10}$ | 1.28<br>$\times 10^{-11}$ | 3.75<br>$\times 10^{-16}$ | 1.84<br>$\times 10^{-9}$  | 3.51<br>$\times 10^{-9}$  | 7.90<br>$\times 10^{-10}$ | 6.75<br>$\times 10^{-10}$ | 8.36<br>$\times 10^{-10}$ | 7.30<br>$\times 10^{-10}$ | 5.15<br>$\times 10^{-10}$ | 2.99<br>$\times 10^{-10}$ |                                   |
| 280    | 1.25<br>$\times 10^{-10}$ | 8.82<br>$\times 10^{-12}$ | 2.03<br>$\times 10^{-16}$ | 1.29<br>$\times 10^{-9}$  | 2.39<br>$\times 10^{-9}$  | 5.85<br>$\times 10^{-10}$ | 4.89<br>$\times 10^{-10}$ | 6.24<br>$\times 10^{-10}$ | 5.51<br>$\times 10^{-10}$ | 3.76<br>$\times 10^{-10}$ | 2.11<br>$\times 10^{-10}$ |                                   |
| 298    | 9.9<br>$\times 10^{-10}$  | 6.33<br>$\times 10^{-12}$ | 1.21<br>$\times 10^{-16}$ | 9.36<br>$\times 10^{-10}$ | 1.70<br>$\times 10^{-9}$  | 4.46<br>$\times 10^{-10}$ | 3.66<br>$\times 10^{-10}$ | 4.78<br>$\times 10^{-10}$ | 4.27<br>$\times 10^{-10}$ | 2.83<br>$\times 10^{-10}$ | 1.54<br>$\times 10^{-10}$ | $(1.11 \pm 0.23) \times 10^{-10}$ |
| 318    | 7.62<br>$\times 10^{-10}$ | 4.39<br>$\times 10^{-12}$ | 7.04<br>$\times 10^{-17}$ | 6.61<br>$\times 10^{-10}$ | 1.18<br>$\times 10^{-9}$  | 3.30<br>$\times 10^{-10}$ | 2.66<br>$\times 10^{-10}$ | 3.56<br>$\times 10^{-10}$ | 3.21<br>$\times 10^{-10}$ | 2.07<br>$\times 10^{-10}$ | 1.10<br>$\times 10^{-10}$ |                                   |
| 333    | 6.24<br>$\times 10^{-10}$ | 3.35<br>$\times 10^{-12}$ | 4.79<br>$\times 10^{-17}$ | 5.11<br>$\times 10^{-10}$ | 8.98<br>$\times 10^{-10}$ | 2.63<br>$\times 10^{-10}$ | 2.10<br>$\times 10^{-10}$ | 2.85<br>$\times 10^{-10}$ | 2.59<br>$\times 10^{-10}$ | 1.64<br>$\times 10^{-10}$ | 8.49<br>$\times 10^{-11}$ |                                   |
| 500    | 6.09<br>$\times 10^{-12}$ | 9.51<br>$\times 10^{-14}$ | 1.50<br>$\times 10^{-18}$ | 3.39<br>$\times 10^{-11}$ | 5.48<br>$\times 10^{-11}$ | 2.20<br>$\times 10^{-11}$ | 1.58<br>$\times 10^{-11}$ | 2.45<br>$\times 10^{-11}$ | 2.36<br>$\times 10^{-11}$ | 1.28<br>$\times 10^{-11}$ | 5.49<br>$\times 10^{-12}$ |                                   |
| 600    | 9.53<br>$\times 10^{-13}$ | 4.90<br>$\times 10^{-15}$ | 2.92<br>$\times 10^{-19}$ | 5.91<br>$\times 10^{-12}$ | 9.79<br>$\times 10^{-12}$ | 4.03<br>$\times 10^{-12}$ | 2.48<br>$\times 10^{-12}$ | 4.71<br>$\times 10^{-12}$ | 4.98<br>$\times 10^{-12}$ | 2.14<br>$\times 10^{-12}$ | 6.38<br>$\times 10^{-13}$ |                                   |
| 800    | 3.00<br>$\times 10^{-15}$ | 3.38<br>$\times 10^{-17}$ | 1.88<br>$\times 10^{-20}$ | 1.79<br>$\times 10^{-14}$ | 3.06<br>$\times 10^{-14}$ | 1.30<br>$\times 10^{-14}$ | 7.04<br>$\times 10^{-15}$ | 1.60<br>$\times 10^{-14}$ | 2.10<br>$\times 10^{-14}$ | 6.89<br>$\times 10^{-15}$ | 1.91<br>$\times 10^{-15}$ |                                   |
| 1000   | 2.85<br>$\times 10^{-17}$ | 8.40<br>$\times 10^{-19}$ | 1.89<br>$\times 10^{-21}$ | 1.19<br>$\times 10^{-16}$ | 1.85<br>$\times 10^{-16}$ | 9.37<br>$\times 10^{-17}$ | 5.72<br>$\times 10^{-17}$ | 1.11<br>$\times 10^{-16}$ | 1.40<br>$\times 10^{-16}$ | 5.68<br>$\times 10^{-17}$ | 2.03<br>$\times 10^{-17}$ |                                   |
| 1200   | 7.81<br>$\times 10^{-19}$ | 4.46<br>$\times 10^{-20}$ | 2.53<br>$\times 10^{-22}$ | 2.55<br>$\times 10^{-18}$ | 3.73<br>$\times 10^{-18}$ | 2.13<br>$\times 10^{-18}$ | 1.41<br>$\times 10^{-18}$ | 2.45<br>$\times 10^{-18}$ | 3.00<br>$\times 10^{-18}$ | 1.41<br>$\times 10^{-18}$ | 6.06<br>$\times 10^{-19}$ |                                   |
| 1400   | 4.17<br>$\times 10^{-20}$ | 3.84<br>$\times 10^{-21}$ | 4.21<br>$\times 10^{-23}$ | 1.15<br>$\times 10^{-19}$ | 1.60<br>$\times 10^{-19}$ | 9.96<br>$\times 10^{-20}$ | 7.00<br>$\times 10^{-20}$ | 1.12<br>$\times 10^{-19}$ | 1.35<br>$\times 10^{-19}$ | 7.06<br>$\times 10^{-20}$ | 3.44<br>$\times 10^{-20}$ |                                   |

|      |                           |                           |                           |                           |                           |                           |                           |                           |                           |                           |                           |  |
|------|---------------------------|---------------------------|---------------------------|---------------------------|---------------------------|---------------------------|---------------------------|---------------------------|---------------------------|---------------------------|---------------------------|--|
| 1600 | 3.50<br>$\times 10^{-21}$ | 4.61<br>$\times 10^{-22}$ | 8.27<br>$\times 10^{-24}$ | 8.44<br>$\times 10^{-21}$ | 1.14<br>$\times 10^{-20}$ | 7.56<br>$\times 10^{-21}$ | 5.56<br>$\times 10^{-21}$ | 8.40<br>$\times 10^{-21}$ | 9.91<br>$\times 10^{-21}$ | 5.64<br>$\times 10^{-21}$ | 3.02<br>$\times 10^{-21}$ |  |
| 1800 | 4.06<br>$\times 10^{-22}$ | 7.10<br>$\times 10^{-23}$ | 1.86<br>$\times 10^{-24}$ | 8.85<br>$\times 10^{-22}$ | 1.16<br>$\times 10^{-21}$ | 8.13<br>$\times 10^{-22}$ | 6.18<br>$\times 10^{-22}$ | 8.92<br>$\times 10^{-22}$ | 1.04<br>$\times 10^{-21}$ | 6.30<br>$\times 10^{-22}$ | 3.64<br>$\times 10^{-22}$ |  |
| 2000 | 6.01<br>$\times 10^{-23}$ | 1.32<br>$\times 10^{-23}$ | 4.69<br>$\times 10^{-25}$ | 1.21<br>$\times 10^{-22}$ | 1.55<br>$\times 10^{-22}$ | 1.13<br>$\times 10^{-22}$ | 8.87<br>$\times 10^{-23}$ | 1.23<br>$\times 10^{-22}$ | 1.43<br>$\times 10^{-22}$ | 9.08<br>$\times 10^{-23}$ | 5.57<br>$\times 10^{-23}$ |  |
| 2200 | 1.08<br>$\times 10^{-23}$ | 2.87<br>$\times 10^{-24}$ | 1.30<br>$\times 10^{-25}$ | 2.04<br>$\times 10^{-23}$ | 2.57<br>$\times 10^{-23}$ | 1.94<br>$\times 10^{-23}$ | 1.55<br>$\times 10^{-23}$ | 2.09<br>$\times 10^{-23}$ | 2.40<br>$\times 10^{-23}$ | 1.59<br>$\times 10^{-23}$ | 1.03<br>$\times 10^{-23}$ |  |
| 2400 | 2.27<br>$\times 10^{-24}$ | 7.04<br>$\times 10^{-25}$ | 3.93<br>$\times 10^{-26}$ | 4.05<br>$\times 10^{-24}$ | 5.03<br>$\times 10^{-24}$ | 3.91<br>$\times 10^{-24}$ | 3.19<br>$\times 10^{-24}$ | 4.19<br>$\times 10^{-24}$ | 4.79<br>$\times 10^{-24}$ | 3.29<br>$\times 10^{-24}$ | 2.21<br>$\times 10^{-24}$ |  |
| 2600 | 5.42<br>$\times 10^{-25}$ | 1.92<br>$\times 10^{-25}$ | 1.27<br>$\times 10^{-26}$ | 9.22<br>$\times 10^{-25}$ | 1.13<br>$\times 10^{-24}$ | 9.02<br>$\times 10^{-25}$ | 7.47<br>$\times 10^{-25}$ | 9.61<br>$\times 10^{-25}$ | 1.09<br>$\times 10^{-24}$ | 7.73<br>$\times 10^{-25}$ | 5.37<br>$\times 10^{-25}$ |  |
| 2800 | 1.44<br>$\times 10^{-25}$ | 5.72<br>$\times 10^{-26}$ | 4.40<br>$\times 10^{-27}$ | 2.36<br>$\times 10^{-25}$ | 2.87<br>$\times 10^{-25}$ | 2.33<br>$\times 10^{-25}$ | 1.95<br>$\times 10^{-25}$ | 2.47<br>$\times 10^{-25}$ | 2.80<br>$\times 10^{-25}$ | 2.03<br>$\times 10^{-25}$ | 1.45<br>$\times 10^{-25}$ |  |
| 3000 | 4.21<br>$\times 10^{-26}$ | 1.84<br>$\times 10^{-26}$ | 1.61<br>$\times 10^{-27}$ | 6.64<br>$\times 10^{-26}$ | 8.00<br>$\times 10^{-26}$ | 6.62<br>$\times 10^{-26}$ | 5.62<br>$\times 10^{-26}$ | 6.99<br>$\times 10^{-26}$ | 7.90<br>$\times 10^{-26}$ | 5.85<br>$\times 10^{-26}$ | 4.30<br>$\times 10^{-26}$ |  |

<sup>a</sup>B3LYP/6-311++G(d,p);<sup>b</sup>BHandHLYP/6-311++G(d,p);<sup>c</sup>MP2/6-311++G(d,p);<sup>d</sup>M11/6-311++G(d,p);<sup>e</sup>MN12SX/6-311++G(d,p);<sup>f</sup>M06-2X/6-311++G(d,p);  
<sup>g</sup>BMC-CCSD//M06-2X/6-311++G(d,p);<sup>h</sup>UCCSD(T)//cc-PVTZ//M06-2X/6-311++G(d,p);<sup>i</sup>M05-2X/6-311++G(d,p);<sup>j</sup>BMC-CCSD//M05-2X/6-311++G(d,p);  
<sup>m</sup>UCCSD(T)//cc-PVTZ//M05-2X/6-311++G(d,p);<sup>n</sup>experimental data

**Table S4** The rate constants at various methods in the temperature of 200-3000 K and at 1.0 Torr He. ( $k$  is in  $\text{cm}^3 \text{ molecule}^{-1} \text{ s}^{-1}$ )

| $T(\text{K})$ | $k^a$                  | $k^b$                  | $k^c$                  | $k^d$                  | $k^e$                  | $k^f$                  | $k^g$                  | $k^h$                             |
|---------------|------------------------|------------------------|------------------------|------------------------|------------------------|------------------------|------------------------|-----------------------------------|
| 200           | $3.08 \times 10^{-11}$ | $1.56 \times 10^{-11}$ | $2.72 \times 10^{-12}$ | $2.97 \times 10^{-11}$ | $9.33 \times 10^{-12}$ | $1.44 \times 10^{-11}$ | $9.91 \times 10^{-12}$ |                                   |
| 220           | $2.04 \times 10^{-11}$ | $1.03 \times 10^{-11}$ | $1.78 \times 10^{-12}$ | $1.95 \times 10^{-11}$ | $6.05 \times 10^{-12}$ | $9.45 \times 10^{-12}$ | $6.58 \times 10^{-12}$ |                                   |
| 240           | $1.37 \times 10^{-11}$ | $6.89 \times 10^{-12}$ | $1.19 \times 10^{-12}$ | $1.30 \times 10^{-11}$ | $4.00 \times 10^{-12}$ | $6.32 \times 10^{-12}$ | $4.44 \times 10^{-12}$ |                                   |
| 260           | $9.38 \times 10^{-12}$ | $4.70 \times 10^{-12}$ | $8.12 \times 10^{-13}$ | $8.85 \times 10^{-12}$ | $2.70 \times 10^{-12}$ | $4.29 \times 10^{-12}$ | $3.04 \times 10^{-12}$ | $(1.27 \pm 0.08) \times 10^{-11}$ |
| 280           | $6.49 \times 10^{-12}$ | $3.25 \times 10^{-12}$ | $5.59 \times 10^{-13}$ | $6.10 \times 10^{-12}$ | $1.84 \times 10^{-12}$ | $2.96 \times 10^{-12}$ | $2.11 \times 10^{-12}$ | $(8.2 \pm 0.9) \times 10^{-12}$   |
| 298           | $4.71 \times 10^{-12}$ | $2.35 \times 10^{-12}$ | $4.04 \times 10^{-13}$ | $4.40 \times 10^{-12}$ | $1.32 \times 10^{-12}$ | $2.14 \times 10^{-12}$ | $1.53 \times 10^{-12}$ | $(6.0 \pm 0.9) \times 10^{-12}$   |
| 318           | $3.33 \times 10^{-12}$ | $1.66 \times 10^{-12}$ | $2.84 \times 10^{-13}$ | $3.10 \times 10^{-12}$ | $9.25 \times 10^{-13}$ | $1.50 \times 10^{-12}$ | $1.08 \times 10^{-12}$ | $(5.0 \pm 0.3) \times 10^{-12}$   |
| 333           | $2.58 \times 10^{-12}$ | $1.28 \times 10^{-12}$ | $2.19 \times 10^{-13}$ | $2.39 \times 10^{-12}$ | $7.12 \times 10^{-13}$ | $1.16 \times 10^{-12}$ | $8.33 \times 10^{-13}$ | $(3.5 \pm 0.2) \times 10^{-12}$   |
| 500           | $1.86 \times 10^{-13}$ | $8.88 \times 10^{-14}$ | $1.38 \times 10^{-14}$ | $1.65 \times 10^{-13}$ | $4.66 \times 10^{-14}$ | $8.07 \times 10^{-14}$ | $5.41 \times 10^{-14}$ |                                   |
| 600           | $2.88 \times 10^{-14}$ | $1.01 \times 10^{-14}$ | $1.02 \times 10^{-15}$ | $2.09 \times 10^{-14}$ | $4.75 \times 10^{-15}$ | $1.08 \times 10^{-14}$ | $4.35 \times 10^{-15}$ |                                   |
| 800           | $5.33 \times 10^{-17}$ | $1.83 \times 10^{-17}$ | $2.14 \times 10^{-18}$ | $3.42 \times 10^{-17}$ | $7.84 \times 10^{-18}$ | $1.79 \times 10^{-17}$ | $7.97 \times 10^{-18}$ |                                   |
| 1000          | $3.46 \times 10^{-19}$ | $1.49 \times 10^{-19}$ | $2.27 \times 10^{-20}$ | $2.43 \times 10^{-19}$ | $6.30 \times 10^{-20}$ | $1.22 \times 10^{-19}$ | $7.49 \times 10^{-20}$ |                                   |
| 1200          | $7.45 \times 10^{-21}$ | $3.72 \times 10^{-21}$ | $6.79 \times 10^{-22}$ | $5.56 \times 10^{-21}$ | $1.56 \times 10^{-21}$ | $2.72 \times 10^{-21}$ | $2.06 \times 10^{-21}$ |                                   |
| 1400          | $3.35 \times 10^{-22}$ | $1.86 \times 10^{-22}$ | $3.87 \times 10^{-23}$ | $2.61 \times 10^{-22}$ | $7.78 \times 10^{-23}$ | $1.25 \times 10^{-22}$ | $1.10 \times 10^{-22}$ |                                   |
| 1600          | $2.47 \times 10^{-23}$ | $1.49 \times 10^{-23}$ | $3.40 \times 10^{-24}$ | $1.98 \times 10^{-23}$ | $6.18 \times 10^{-24}$ | $9.35 \times 10^{-24}$ | $9.26 \times 10^{-24}$ |                                   |
| 1800          | $2.59 \times 10^{-24}$ | $1.66 \times 10^{-24}$ | $4.10 \times 10^{-25}$ | $2.13 \times 10^{-24}$ | $6.88 \times 10^{-25}$ | $9.94 \times 10^{-25}$ | $1.08 \times 10^{-24}$ |                                   |
| 2000          | $3.55 \times 10^{-25}$ | $2.40 \times 10^{-25}$ | $6.28 \times 10^{-26}$ | $2.97 \times 10^{-25}$ | $9.87 \times 10^{-26}$ | $1.37 \times 10^{-25}$ | $1.59 \times 10^{-25}$ |                                   |
| 2200          | $5.99 \times 10^{-26}$ | $4.21 \times 10^{-26}$ | $1.16 \times 10^{-26}$ | $5.09 \times 10^{-26}$ | $1.73 \times 10^{-26}$ | $2.33 \times 10^{-26}$ | $2.86 \times 10^{-26}$ |                                   |
| 2400          | $1.19 \times 10^{-26}$ | $8.67 \times 10^{-27}$ | $2.48 \times 10^{-27}$ | $1.02 \times 10^{-26}$ | $3.54 \times 10^{-27}$ | $4.67 \times 10^{-27}$ | $6.01 \times 10^{-27}$ |                                   |
| 2600          | $2.72 \times 10^{-27}$ | $2.04 \times 10^{-27}$ | $6.04 \times 10^{-28}$ | $2.36 \times 10^{-27}$ | $8.30 \times 10^{-28}$ | $1.07 \times 10^{-27}$ | $1.43 \times 10^{-27}$ |                                   |
| 2800          | $6.96 \times 10^{-28}$ | $5.35 \times 10^{-28}$ | $1.63 \times 10^{-28}$ | $6.10 \times 10^{-28}$ | $2.17 \times 10^{-28}$ | $2.75 \times 10^{-28}$ | $3.81 \times 10^{-28}$ |                                   |
| 3000          | $1.96 \times 10^{-28}$ | $1.54 \times 10^{-28}$ | $4.82 \times 10^{-29}$ | $1.73 \times 10^{-28}$ | $6.24 \times 10^{-29}$ | $7.77 \times 10^{-29}$ | $1.11 \times 10^{-28}$ |                                   |

<sup>a</sup>M05-2X/6-311++G(d,p);<sup>b</sup>BMC-CCSD//M05-2X/6-311++G(d,p);<sup>c</sup>UCCSD(T)/cc-PVTZ//M05-2X/6-311++G(d,p);<sup>d</sup>M06-2X/6-311++G(d,p);  
<sup>e</sup>BMC-CCSD//M06-2X/6-311++G(d,p);<sup>f</sup>UCCSD(T)/cc-PVTZ//M06-2X/6-311++G(d,p);<sup>g</sup>B3LYP/6-311++G(d,p);<sup>h</sup>experimental data

**Table S5** The rate constants at various methods in the pressures of  $10^{-5}$ - $10^9$  Torr He and at 298 K

| P(Torr)   | $k^a$                  | $k^b$                  | $k^c$                  | $k^d$                  | $k^e$                  | $k^f$                  | $k^g$                  | $k^h$                            |
|-----------|------------------------|------------------------|------------------------|------------------------|------------------------|------------------------|------------------------|----------------------------------|
| $10^{-5}$ | $4.78 \times 10^{-17}$ | $2.37 \times 10^{-17}$ | $4.05 \times 10^{-18}$ | $1.77 \times 10^{-17}$ | $1.33 \times 10^{-17}$ | $2.15 \times 10^{-17}$ | $1.67 \times 10^{-17}$ |                                  |
| $10^{-4}$ | $4.78 \times 10^{-16}$ | $2.37 \times 10^{-16}$ | $4.05 \times 10^{-17}$ | $1.77 \times 10^{-16}$ | $1.33 \times 10^{-16}$ | $2.15 \times 10^{-16}$ | $1.67 \times 10^{-16}$ |                                  |
| $10^{-3}$ | $4.78 \times 10^{-15}$ | $2.37 \times 10^{-15}$ | $4.05 \times 10^{-16}$ | $1.77 \times 10^{-15}$ | $1.33 \times 10^{-15}$ | $2.15 \times 10^{-15}$ | $1.67 \times 10^{-15}$ |                                  |
| 0.01      | $4.78 \times 10^{-14}$ | $2.37 \times 10^{-14}$ | $4.05 \times 10^{-15}$ | $1.77 \times 10^{-14}$ | $1.33 \times 10^{-14}$ | $2.15 \times 10^{-14}$ | $1.67 \times 10^{-14}$ |                                  |
| 0.5       | $2.37 \times 10^{-12}$ | $1.18 \times 10^{-12}$ | $2.02 \times 10^{-13}$ | $8.84 \times 10^{-13}$ | $6.63 \times 10^{-13}$ | $1.07 \times 10^{-12}$ | $7.94 \times 10^{-13}$ | $(3.0 \pm 0.9) \times 10^{-12}$  |
| 1         | $4.71 \times 10^{-12}$ | $2.35 \times 10^{-12}$ | $4.04 \times 10^{-13}$ | $1.76 \times 10^{-12}$ | $1.32 \times 10^{-12}$ | $2.14 \times 10^{-12}$ | $1.53 \times 10^{-12}$ | $(6.0 \pm 0.9) \times 10^{-12}$  |
| 1.5       | $7.02 \times 10^{-12}$ | $3.52 \times 10^{-12}$ | $6.06 \times 10^{-13}$ | $2.63 \times 10^{-12}$ | $1.98 \times 10^{-12}$ | $3.20 \times 10^{-12}$ | $2.22 \times 10^{-12}$ | $(7.6 \pm 1.1) \times 10^{-12}$  |
| 2         | $9.29 \times 10^{-12}$ | $4.67 \times 10^{-12}$ | $8.07 \times 10^{-13}$ | $3.50 \times 10^{-12}$ | $2.64 \times 10^{-12}$ | $4.25 \times 10^{-12}$ | $2.88 \times 10^{-12}$ | $(7.00 \pm 1) \times 10^{-12}$   |
| 2.5       | $1.15 \times 10^{-11}$ | $5.82 \times 10^{-12}$ | $1.01 \times 10^{-12}$ | $4.36 \times 10^{-12}$ | $3.29 \times 10^{-12}$ | $5.30 \times 10^{-12}$ | $3.51 \times 10^{-12}$ | $(8.8 \pm 0.9) \times 10^{-12}$  |
| 3         | $1.38 \times 10^{-11}$ | $6.96 \times 10^{-12}$ | $1.21 \times 10^{-12}$ | $5.22 \times 10^{-12}$ | $3.95 \times 10^{-12}$ | $6.35 \times 10^{-12}$ | $4.12 \times 10^{-12}$ | $(1.14 \pm 0.9) \times 10^{-11}$ |
| 100       | $2.53 \times 10^{-10}$ | $1.57 \times 10^{-10}$ | $3.64 \times 10^{-11}$ | $1.25 \times 10^{-10}$ | $1.06 \times 10^{-10}$ | $1.54 \times 10^{-10}$ | $5.99 \times 10^{-11}$ |                                  |
| 400       | $5.47 \times 10^{-10}$ | $3.85 \times 10^{-10}$ | $1.18 \times 10^{-10}$ | $3.27 \times 10^{-10}$ | $2.95 \times 10^{-10}$ | $3.96 \times 10^{-10}$ | $1.31 \times 10^{-10}$ |                                  |
| 760       | $7.20 \times 10^{-10}$ | $5.36 \times 10^{-10}$ | $1.89 \times 10^{-10}$ | $4.75 \times 10^{-10}$ | $4.38 \times 10^{-10}$ | $5.64 \times 10^{-10}$ | $1.77 \times 10^{-10}$ |                                  |
| 1000      | $7.97 \times 10^{-10}$ | $6.08 \times 10^{-10}$ | $2.28 \times 10^{-10}$ | $5.48 \times 10^{-10}$ | $5.11 \times 10^{-10}$ | $6.45 \times 10^{-10}$ | $3.83 \times 10^{-10}$ |                                  |
| $10^4$    | $1.36 \times 10^{-9}$  | $1.23 \times 10^{-9}$  | $7.56 \times 10^{-10}$ | $1.29 \times 10^{-9}$  | $1.27 \times 10^{-9}$  | $1.40 \times 10^{-9}$  | $4.82 \times 10^{-10}$ |                                  |
| $10^5$    | $1.58 \times 10^{-9}$  | $1.56 \times 10^{-9}$  | $1.34 \times 10^{-9}$  | $1.81 \times 10^{-9}$  | $1.82 \times 10^{-9}$  | $1.85 \times 10^{-9}$  | $5.03 \times 10^{-10}$ |                                  |
| $10^6$    | $1.62 \times 10^{-9}$  | $1.63 \times 10^{-9}$  | $1.58 \times 10^{-9}$  | $1.95 \times 10^{-9}$  | $1.98 \times 10^{-9}$  | $1.96 \times 10^{-9}$  | $5.06 \times 10^{-10}$ |                                  |
| $10^7$    | $1.63 \times 10^{-9}$  | $1.64 \times 10^{-9}$  | $1.62 \times 10^{-9}$  | $1.96 \times 10^{-9}$  | $2.00 \times 10^{-9}$  | $1.97 \times 10^{-9}$  | $5.06 \times 10^{-10}$ |                                  |
| $10^8$    | $1.63 \times 10^{-9}$  | $1.64 \times 10^{-9}$  | $1.63 \times 10^{-9}$  | $1.97 \times 10^{-9}$  | $2.00 \times 10^{-9}$  | $1.97 \times 10^{-9}$  | $5.06 \times 10^{-10}$ |                                  |
| $10^9$    | $1.63 \times 10^{-9}$  | $1.64 \times 10^{-9}$  | $1.63 \times 10^{-9}$  | $1.97 \times 10^{-9}$  | $2.00 \times 10^{-9}$  | $1.97 \times 10^{-9}$  | $1.77 \times 10^{-10}$ |                                  |

<sup>a</sup>M05-2X/6-311++G(d,p); <sup>b</sup>BMC-CCSD//M05-2X/6-311++G(d,p); <sup>c</sup>UCCSD(T)/cc-PVTZ//M05-2X/6-311++G(d,p); <sup>d</sup>M06-2X/6-311++G(d,p);  
<sup>e</sup>BMC-CCSD//M06-2X/6-311++G(d,p); <sup>f</sup>UCCSD(T)/cc-PVTZ//M06-2X/6-311++G(d,p); <sup>g</sup>B3LYP/6-311++G(d,p); <sup>h</sup>experimental data
